# Supplementary material
Source: PubMed Central journal article supplement (PMC3358101)
Supplement: Supp_Data.pdf [file Supp_Data.pdf]

## Supplementary Data

SUPPLEMENTARY TABLE S1. SEQUENCE POLYMORPHISMS IN HIV-1 NEF FUNCTIONAL DOMAINS POTENTIALLY ASSOCIATED WITH HIV-ASSOCIATED PULMONARY ARTERIAL HYPERTENSION

| Specific variation or functional domain             | Nef residue | Subtype consensus | New residue | France/Italy                     |                |                                |                 | San Francisco, California        |                |                                |                 |                  |
|-----------------------------------------------------|-------------|-------------------|-------------|----------------------------------|----------------|--------------------------------|-----------------|----------------------------------|----------------|--------------------------------|-----------------|------------------|
|                                                     |             |                   |             | % of subjects with polymorphisms |                | % of clones with polymorphisms |                 | % of subjects with polymorphisms |                | % of clones with polymorphisms |                 |                  |
|                                                     |             |                   |             | HIV-PH<br>n=11                   | Control<br>n=7 | HIV-PH<br>c=207                | Control<br>c=88 | G-value <sup>a</sup>             | HIV-PH<br>n=11 | Control<br>n=22                | HIV-PH<br>c=135 | Control<br>c=333 |
| Around M <sub>20</sub> (MHC-1/AP-1 binding site)    | 19          | R                 | K           | 9%                               | 0%             | 7.7%                           | 0               | 10.81                            | 18.2%          | 13.6%                          | 2.2%            | 8.7%             |
|                                                     | <b>21</b>   | <b>R</b>          | <b>Q</b>    | <b>18%</b>                       | <b>0%</b>      | <b>5.8%</b>                    | <b>0%</b>       | <b>7.31</b>                      | <b>9.1%</b>    | <b>9.1%</b>                    | <b>3.0%</b>     | <b>4.5%</b>      |
| CD4 downregulation (WL)                             | 58          | L                 | V           | 27%                              | 0%             | 17.4%                          | 0%              | 23.18                            | 9.1%           | 9.1%                           | 8.9%            |                  |
| Acidic cluster                                      | 63          | E                 | G           | 18%                              | 0%             | 14.5%                          | 0%              | 20.95                            | 9.1%           | 0%                             | 2.2%            | 0%               |
| Phosphorylation site for PKC                        | 79          | M                 | I           | 9%                               | 0%             | 4.4%                           | 0%              | 5.36                             | 0%             | 0%                             | 0%              | 0%               |
|                                                     | 80          | T                 | N           | 18%                              | 0%             | 9.2%                           | 0%              | 12.58                            | 9.1%           | 4.5%                           | 2.2%            | 1.2%             |
|                                                     | <b>81</b>   | <b>Y</b>          | <b>F</b>    | <b>55%</b>                       | <b>15%</b>     | <b>35.3%</b>                   | <b>11.4%</b>    | <b>14.23</b>                     | <b>54.5%</b>   | <b>27.3%</b>                   | <b>3.0%</b>     | <b>19.5%</b>     |
| Proline-rich area (PxxP)                            | 150         | P                 | A,R,S,K,Q   | 46%                              | 0%             | 25.5%                          | 0%              | 16.06                            | 36.4%          | 9.1%                           | 14.8%           | 6.3%             |
| H <sub>40</sub> Y (SHIV <sub>nef</sub> mutation #2) | 40          | H                 | Y           | 64%                              | 29%            | 25.1%                          | 13.6%           | 0.01                             | 9.1%           | 9.1%                           | 4.4%            | 7.5%             |
| A <sub>53</sub> P (SHIV <sub>nef</sub> mutation #3) | 53          | A                 | P           | 27%                              | 0%             | 23.2%                          | 0%              | 31.98                            | 27.3%          | 4.5%                           | 28.1%           | 2.1%             |

<sup>a</sup>G-value for ranking purposes only.

Nef has highly conserved protein domains essential for its function, which are mapped to specific locations in the polypeptide.<sup>21</sup> The frequency of Nef amino acid residues per position was determined for each molecular clone. The consensus residue per position was deduced from HIV-1 Nef subtype B sequences.<sup>7</sup> Polymorphisms were ranked using G tests for independence with William's correction. Note that these values are a heuristic for ranking the polymorphisms of interest rather than measures of significance, as they do not correct for the relationships among sequences intrasubject or for multiple comparisons. The polymorphisms that were overrepresented in the HIV-PH subjects and confirmed in the second cohort are in italics.

MHC, major histocompatibility complex; AP-1, adaptor protein- 1; PKC, protein kinase C.

SUPPLEMENTARY TABLE S2. SENSITIVITY AND SPECIFICITY FROM THE ROC ANALYSIS OF THE INITIAL AND VALIDATION COHORTS

| Cohort               | Cutoff | Sensitivity % | 95% CI         | Specificity % | 95% CI         |
|----------------------|--------|---------------|----------------|---------------|----------------|
| <b>European</b>      | >1     | 90.9          | 58.7% to 99.8% | 57.1          | 18.4% to 90.1% |
|                      | >2     | 72.7          | 39.0% to 94.0% | 100           | 59.0% to 100%  |
|                      | >3     | 54.6          | 23.4% to 83.8  | 100           | 59.0% to 100%  |
|                      | >4     | 27.3          | 6.0% to 61.0%  | 100           | 59.0% to 100%  |
|                      | >5     | 9.1           | 0.2% to 41.3%  | 100           | 59.0% to 100%  |
| <b>San Francisco</b> | >1     | 90.9          | 58.7% to 99.8% | 40.9          | 20.7% to 63.7% |
|                      | >2     | 63.6          | 30.8% to 89.1% | 77.3          | 54.6% to 92.2% |
|                      | >3     | 9.1           | 0.23% to 41.3% | 95.5          | 77.2% to 99.9% |
|                      | >4     | 9.1           | 0.23% to 41.3% | 100           | 84.6% to 100%  |

We generated receiver-operator characteristic (ROC) curves for samples received from Europe and UCSF to establish a threshold in terms of number of Nef functional domains with genotypic changes. French subjects with only one variant Nef functional domain are 2.12 times more likely to develop HIV-PH than a subject with zero changes. Area under the ROC curve, 0.8961; SE, 0.07641; 95% CI, 0.7463 to 1.046; *p* value=0.005761. Subjects from San Francisco with one, two, and three variant Nef functional domains are 1.54, 2.8, and 2 times more likely to develop HIV-PH, respectively, than a subject with zero variations. Area under the ROC curve, 0.7417; SE, 0.09098; 95% CI, 0.5634 to 0.9201; *p* value=0.02552. Cutoff values with higher sensitivity (true positive rate) and specificity (true negative rate) are in italics.

## Supplementary References

1. Humbert M, Sitbon O, Chaouat A, *et al.*: Pulmonary arterial hypertension in France: Results from a national registry. *Am J Respir Crit Care Med* 2006;173(9):1023–1030.
2. Petrosillo N, Chinello P, Vizza D, and Cicalini S: [Pulmonary hypertension and HIV: Implementation of a Regional Registry]. *Infez Med* 2005;13(1):5–15.
3. Montani D, Marcelin AG, Sitbon O, Calvez V, Simonneau G, and Humbert M: Human herpes virus 8 in HIV and non-HIV infected patients with pulmonary arterial hypertension in France. *AIDS* 2005;19(11):1239–1240.
4. Shugars DC, Smith MS, Glueck DH, Nantermet PV, Seillier-Moiseiwitsch F, and Swanstrom R: Analysis of human immunodeficiency virus type 1 nef gene sequences present in vivo. *J Virol* 1993;67(8):4639–4650.
5. Lewis MJ, Balamurugan A, Ohno A, Kilpatrick S, Ng HL, and Yang OO: Functional adaptation of Nef to the immune milieu of HIV-1 infection in vivo. *J Immunol* 2008;180(6):4075–4081.
6. Drummond AJ, Ashton B, Cheung M, *et al.*: Geneious v5.0. <http://www.geneious.com>.
7. O'Neill E, Kuo LS, Krisko JF, Tomchick DR, Garcia JV, and Foster JL: Dynamic evolution of the human immunodeficiency virus type 1 pathogenic factor, Nef. *J Virol* 2006;80(3):1311–1320.
8. Bateman A, Birney E, Durbin R, Eddy SR, Finn RD, and Sonnhammer EL: Pfam 3.1: 1313 multiple alignments and profile HMMs match the majority of proteins. *Nucleic Acids Res* 1999;27(1):260–262.
9. Thompson JD, Higgins DG, and Gibson TJ: CLUSTAL W: Improving the sensitivity of progressive multiple sequence alignment through sequence weighting, position-specific gap penalties and weight matrix choice. *Nucleic Acids Res* 1994;22(22):4673–4680.
10. Knight R, Maxwell P, Birmingham A, *et al.*: PyCogent: A toolkit for making sense from sequence. *Genome Biol* 2007;8(8):R171.
11. Lozupone C, Hamady M, and Knight R: UniFrac—an online tool for comparing microbial community diversity in a phylogenetic context. *BMC Bioinformatics* 2006;7:371.
12. Lozupone C and Knight R: UniFrac: A new phylogenetic method for comparing microbial communities. *Appl Environ Microbiol* 2005;71(12):8228–8235.
13. Lozupone CA, Hamady M, Cantarel BL, *et al.*: The convergence of carbohydrate active gene repertoires in human gut microbes. *Proc Natl Acad Sci USA* 2008;105(39):15076–15081.
14. Kelley LA and Sternberg MJ: Protein structure prediction on the Web: A case study using the Phyre server. *Nat Protoc* 2009;4(3):363–371.
15. Geyer M, Munte CE, Schorr J, Kellner R, and Kalbitzer HR: Structure of the anchor-domain of myristoylated and non-myristoylated HIV-1 Nef protein. *J Mol Biol* 1999;289(1):123–138.
16. Berman HM, Westbrook J, Feng Z, *et al.*: The Protein Data Bank. *Nucleic Acids Res* 2000;28(1):235–242.
17. Poe JA and Smithgall TE: HIV-1 Nef dimerization is required for Nef-mediated receptor downregulation and viral replication. *J Mol Biol* 2009;394(2):329–342.
18. Raney A, Shaw AY, Foster JL, and Garcia JV: Structural constraints on human immunodeficiency virus type 1 Nef function. *Virology* 2007;368(1):7–16.
19. Los GV, Encell LP, McDougall MG, *et al.*: HaloTag: A novel protein labeling technology for cell imaging and protein analysis. *ACS Chem Biol* 2008;3(6):373–382.
20. Chesebro B and Wehrly K: Development of a sensitive quantitative focal assay for human immunodeficiency virus infectivity. *J Virol* 1988;62(10):3779–3788.
21. Geyer M, Fackler OT, and Peterlin BM: Structure–function relationships in HIV-1 Nef. *EMBO Rep* 2001;2(7):580–585.
